# Supplementary material for: A study on multi-omic oscillations in Escherichia coli metabolic networks
Source: PubMed Central journal article supplement (PMC6069781; doi:10.1186/s12859-018-2175-5), 2018-07-09
Supplement: 12859_2018_2175_MOESM2_ESM.pdf [file 12859_2018_2175_MOESM2_ESM.pdf]

The study of multi-omic oscillations in  
Escherichia coli metabolic networks

|                           |                      |
|---------------------------|----------------------|
| Francesco Bardozzo        | Pietro Lió           |
| NeuRoNe Lab, DISA-MIS     | Computer Laboratory  |
| Via Giovanni Paolo II 132 | 15 JJ Thomson Ave    |
| Salerno <u>IT</u>         | Cambridge, <u>UK</u> |

Roberto Tagliaferri  
NeuRoNe Lab, DISA-MIS  
Via Giovanni Paolo II 132  
Salerno IT

November 8, 2017

## 1 Oscillating multi-omics measures on E.coli 66 pathways in standard conditions

The similarity of observed oscillating multi-omics patterns with respect to ideal patterns ( $\sigma_{obs}$ ), the pathway dyadic/anti-dyadic effect magnitudes,  $\widehat{m}_{10}$  and  $\widehat{m}_{1100}$  and the reciprocal influences  $RI$  given in output from MORA, are observed on 66 pathways in standard conditions. These measures are taken on MLS without pathway modifications, with operon compressions, with path extensions and with operon compression followed by path extensions. Tables row names are labeled with their unique *E.coli* KEGG identifier code (*eco: pathNNNN*).

| Steady state cond.<br>MLS | Pathway        | Pathway with path extensions |                      |      |                | Pathway with operon compression |                      |      |                | Pathway with operon compression and path extensions |                      |      |                |                    |                      |      |
|---------------------------|----------------|------------------------------|----------------------|------|----------------|---------------------------------|----------------------|------|----------------|-----------------------------------------------------|----------------------|------|----------------|--------------------|----------------------|------|
| KEGG eco:path             | $\sigma_{obs}$ | $\widehat{m}_{10}$           | $\widehat{m}_{1100}$ | RI   | $\sigma_{obs}$ | $\widehat{m}_{10}$              | $\widehat{m}_{1100}$ | RI   | $\sigma_{obs}$ | $\widehat{m}_{10}$                                  | $\widehat{m}_{1100}$ | RI   | $\sigma_{obs}$ | $\widehat{m}_{10}$ | $\widehat{m}_{1100}$ | infl |
| 00010                     | 0.62           | 1.99                         | 2.14                 | 1.00 | 0.74           | 1.35                            | 1.46                 | 2.00 | 0.66           | 1.99                                                | 2.14                 | 1.00 | 0.82           | 1.35               | 1.46                 | 2.00 |
| 00020                     | 0.38           | 2.40                         | 1.40                 | 1.50 | 0.68           | 0.91                            | 1.13                 | 2.00 | 0.62           | 2.40                                                | 1.40                 | 1.50 | 0.69           | 0.91               | 1.13                 | 4.50 |
| 00030                     | 0.55           | 2.13                         | 2.19                 | 1.50 | 0.76           | 1.24                            | 1.34                 | 2.00 | 0.54           | 2.13                                                | 2.19                 | 1.50 | 0.76           | 1.24               | 1.34                 | 2.00 |
| 00040                     | 0.67           | 2.56                         | 1.38                 | 1.50 | 0.76           | 1.78                            | 1.37                 | 2.00 | 0.47           | 2.56                                                | 1.38                 | 1.50 | 0.67           | 1.78               | 1.37                 | 2.00 |
| 00051                     | 0.57           | 2.00                         | 2.02                 | 1.25 | 0.76           | 1.54                            | 1.56                 | 2.00 | 0.57           | 2.00                                                | 2.02                 | 1.00 | 0.74           | 1.54               | 1.56                 | 2.00 |
| 00052                     | 0.72           | 1.94                         | 2.06                 | 1.00 | 0.76           | 1.44                            | 1.59                 | 1.50 | 0.65           | 1.94                                                | 2.06                 | 1.00 | 0.62           | 1.44               | 1.59                 | 1.50 |
| 00053                     | 0.27           | 1.95                         | 2.61                 | 1.50 | 0.68           | 1.08                            | 0.99                 | 3.00 | 0.30           | 1.95                                                | 2.61                 | 1.50 | 0.65           | 1.08               | 0.99                 | 3.00 |
| 00061                     | 0.64           | 1.08                         | 1.74                 | 1.25 | 0.64           | 0.39                            | 1.52                 | 1.50 | 0.57           | 1.08                                                | 1.74                 | 1.00 | 0.67           | 0.39               | 1.52                 | 1.50 |
| 00071                     | 0.46           | 2.06                         | 1.24                 | 1.50 | 0.73           | 2.28                            | 0.90                 | 2.00 | 0.45           | 2.06                                                | 1.24                 | 1.50 | 0.79           | 2.28               | 0.90                 | 2.00 |
| 00130                     | 0.58           | 2.16                         | 2.45                 | 1.00 | 0.68           | 0.84                            | 0.72                 | 3.50 | 0.69           | 2.16                                                | 2.45                 | 1.00 | 0.68           | 0.84               | 0.72                 | 3.25 |
| 00190                     | 0.58           | 2.67                         | 1.22                 | 1.00 | 0.79           | 1.13                            | 1.59                 | 1.50 | 0.38           | 2.67                                                | 1.22                 | 1.00 | 0.38           | 1.13               | 1.59                 | 1.75 |
| 00220                     | 0.75           | 2.05                         | 2.04                 | 1.50 | 0.87           | 1.39                            | 1.36                 | 2.00 | 0.71           | 2.05                                                | 2.04                 | 1.50 | 0.86           | 1.39               | 1.36                 | 2.00 |
| 00230                     | 0.53           | 1.87                         | 2.12                 | 1.00 | 0.77           | 1.04                            | 1.06                 | 2.00 | 0.58           | 1.87                                                | 2.12                 | 1.00 | 0.72           | 1.04               | 1.06                 | 2.00 |
| 00240                     | 0.52           | 1.76                         | 2.11                 | 1.00 | 0.80           | 1.40                            | 1.16                 | 2.00 | 0.53           | 1.76                                                | 2.11                 | 1.00 | 0.75           | 1.40               | 1.16                 | 2.00 |
| 00250                     | 0.63           | 2.05                         | 1.80                 | 1.00 | 0.80           | 1.50                            | 1.43                 | 2.00 | 0.58           | 2.05                                                | 1.80                 | 1.00 | 0.78           | 1.50               | 1.43                 | 2.00 |
| 00260                     | 0.69           | 1.73                         | 2.29                 | 1.00 | 0.72           | 1.39                            | 1.77                 | 1.50 | 0.71           | 1.73                                                | 2.29                 | 1.00 | 0.71           | 1.39               | 1.77                 | 1.50 |
| 00261                     | 0.44           | 1.90                         | 1.19                 | 1.50 | 0.71           | 1.28                            | 0.63                 | 2.00 | 0.25           | 1.90                                                | 1.19                 | 1.50 | 0.62           | 1.28               | 0.63                 | 2.00 |
| 00270                     | 0.53           | 1.63                         | 2.13                 | 1.00 | 0.67           | 1.22                            | 1.54                 | 2.00 | 0.57           | 1.63                                                | 2.13                 | 1.00 | 0.71           | 1.22               | 1.54                 | 2.00 |
| 00280                     | 0.50           | 1.22                         | 2.69                 | 1.50 | 0.54           | 1.11                            | 1.92                 | 1.50 | 0.50           | 1.22                                                | 2.69                 | 1.00 | 0.60           | 1.11               | 1.92                 | 1.50 |
| 00290                     | 0.43           | 1.67                         | 2.36                 | 1.50 | 0.47           | 1.35                            | 1.97                 | 1.50 | 0.29           | 1.67                                                | 2.36                 | 1.00 | 0.40           | 1.35               | 1.97                 | 1.50 |
| 00300                     | 0.79           | 1.74                         | 2.23                 | 1.00 | 0.83           | 1.74                            | 1.44                 | 1.00 | 0.85           | 1.74                                                | 2.23                 | 1.00 | 0.88           | 1.74               | 1.44                 | 1.25 |
| 00310                     | 0.64           | 1.47                         | 1.72                 | 1.50 | 0.75           | 1.73                            | 1.63                 | 1.50 | 0.38           | 1.47                                                | 1.72                 | 1.00 | 0.56           | 1.73               | 1.63                 | 1.50 |
| 00330                     | 0.54           | 1.93                         | 1.77                 | 1.50 | 0.73           | 1.18                            | 1.03                 | 2.75 | 0.60           | 1.93                                                | 1.77                 | 1.25 | 0.81           | 1.18               | 1.03                 | 2.00 |
| 00340                     | 0.29           | 1.00                         | 3.36                 | 1.50 | 0.73           | 1.36                            | 1.34                 | 2.00 | 0.29           | 1.00                                                | 3.36                 | 1.50 | 0.75           | 1.36               | 1.34                 | 2.00 |

|       |      |      |      |      |      |      |      |      |      |      |      |      |      |      |      |      |
|-------|------|------|------|------|------|------|------|------|------|------|------|------|------|------|------|------|
| 00360 | 0.50 | 1.33 | 1.85 | 1.50 | 0.71 | 1.78 | 1.96 | 2.00 | 0.60 | 1.33 | 1.85 | 1.50 | 0.80 | 1.78 | 1.96 | 1.75 |
| 00362 | 0.33 | 1.82 | 2.52 | 2.00 | 0.50 | 0.98 | 1.31 | 3.50 | 0.60 | 1.82 | 2.52 | 1.75 | 0.78 | 0.98 | 1.31 | 2.75 |
| 00380 | 0.25 | 1.71 | 2.53 | 1.00 | 0.57 | 1.88 | 2.13 | 2.00 | 0.25 | 1.71 | 2.53 | 1.00 | 0.57 | 1.88 | 2.13 | 2.00 |
| 00400 | 0.70 | 1.82 | 1.75 | 1.00 | 0.78 | 1.54 | 1.51 | 1.50 | 0.47 | 1.82 | 1.75 | 1.25 | 0.60 | 1.54 | 1.51 | 1.50 |
| 00410 | 0.29 | 2.29 | 1.68 | 1.00 | 0.80 | 1.32 | 1.62 | 2.00 | 0.31 | 2.29 | 1.68 | 1.00 | 0.78 | 1.32 | 1.62 | 2.00 |
| 00440 | 0.75 | 1.67 | 1.67 | 1.50 | 0.75 | 1.67 | 1.67 | 1.50 | 0.75 | 1.67 | 1.67 | 1.50 | 0.75 | 1.67 | 1.67 | 1.50 |
| 00450 | 0.56 | 2.27 | 1.77 | 1.00 | 0.75 | 0.96 | 0.96 | 2.00 | 0.50 | 2.27 | 1.77 | 1.00 | 0.71 | 0.96 | 0.96 | 2.00 |
| 00480 | 0.72 | 2.29 | 1.67 | 1.50 | 0.74 | 1.69 | 1.29 | 1.50 | 0.72 | 2.29 | 1.67 | 1.50 | 0.74 | 1.69 | 1.29 | 1.50 |
| 00500 | 0.61 | 2.00 | 2.99 | 1.25 | 0.72 | 1.34 | 1.30 | 2.00 | 0.50 | 2.00 | 2.99 | 1.00 | 0.69 | 1.34 | 1.30 | 2.00 |
| 00520 | 0.57 | 2.21 | 1.81 | 1.00 | 0.68 | 1.25 | 1.20 | 2.00 | 0.54 | 2.21 | 1.81 | 1.00 | 0.66 | 1.25 | 1.20 | 2.00 |
| 00521 | 0.62 | 2.57 | 0.86 | 1.50 | 0.85 | 1.18 | 1.34 | 2.25 | 1.00 | 2.57 | 0.86 | 1.00 | 1.00 | 1.18 | 1.34 | 2.00 |
| 00540 | 0.54 | 1.82 | 1.77 | 1.00 | 0.73 | 0.97 | 0.77 | 2.50 | 0.48 | 1.82 | 1.77 | 1.00 | 0.71 | 0.97 | 0.77 | 2.50 |
| 00550 | 0.55 | 1.94 | 1.20 | 1.00 | 0.53 | 1.44 | 1.69 | 2.00 | 0.53 | 1.94 | 1.20 | 0.75 | 0.52 | 1.44 | 1.69 | 2.00 |
| 00561 | 0.73 | 2.20 | 2.46 | 1.00 | 0.71 | 1.82 | 2.70 | 1.50 | 0.60 | 2.20 | 2.46 | 1.00 | 0.62 | 1.82 | 2.70 | 1.50 |
| 00564 | 0.39 | 1.36 | 1.67 | 1.00 | 0.62 | 1.50 | 1.57 | 1.50 | 0.36 | 1.36 | 1.67 | 1.00 | 0.61 | 1.50 | 1.57 | 1.50 |
| 00620 | 0.38 | 1.98 | 2.06 | 1.50 | 0.76 | 0.79 | 0.86 | 4.00 | 0.45 | 1.98 | 2.06 | 1.50 | 0.82 | 0.79 | 0.86 | 4.00 |
| 00627 | 0.83 | 3.50 | 0.00 | 1.00 | 0.88 | 1.23 | 3.80 | 1.50 | 0.60 | 3.50 | 0.00 | 1.00 | 0.71 | 1.23 | 3.80 | 1.50 |
| 00630 | 0.47 | 1.89 | 1.81 | 1.00 | 0.73 | 1.21 | 1.27 | 2.00 | 0.46 | 1.89 | 1.81 | 1.00 | 0.77 | 1.21 | 1.27 | 2.00 |
| 00640 | 0.46 | 2.00 | 1.94 | 1.00 | 0.68 | 1.80 | 1.52 | 2.00 | 0.46 | 2.00 | 1.94 | 1.00 | 0.64 | 1.80 | 1.52 | 2.00 |
| 00650 | 0.38 | 1.59 | 2.00 | 1.00 | 0.65 | 0.82 | 0.91 | 2.00 | 0.48 | 1.59 | 2.00 | 1.00 | 0.63 | 0.82 | 0.91 | 3.75 |
| 00660 | 0.38 | 1.50 | 1.50 | 1.00 | 0.64 | 2.10 | 1.30 | 1.75 | 0.67 | 1.50 | 1.50 | 1.00 | 0.80 | 2.10 | 1.30 | 1.50 |
| 00670 | 0.38 | 1.71 | 2.33 | 1.75 | 0.72 | 1.36 | 1.89 | 2.00 | 0.38 | 1.71 | 2.33 | 1.75 | 0.72 | 1.36 | 1.89 | 2.00 |
| 00680 | 0.58 | 2.21 | 2.11 | 1.00 | 0.77 | 1.46 | 1.82 | 2.00 | 0.50 | 2.21 | 2.11 | 1.00 | 0.69 | 1.46 | 1.82 | 2.00 |
| 00730 | 0.57 | 1.91 | 2.08 | 1.00 | 0.74 | 1.68 | 1.49 | 1.50 | 0.57 | 1.91 | 2.08 | 1.00 | 0.74 | 1.68 | 1.49 | 1.50 |
| 00740 | 0.67 | 0.94 | 1.99 | 1.50 | 0.73 | 0.62 | 1.40 | 1.75 | 0.50 | 0.94 | 1.99 | 1.50 | 0.60 | 0.62 | 1.40 | 1.50 |
| 00750 | 0.50 | 1.92 | 2.32 | 1.50 | 0.62 | 0.95 | 1.51 | 2.00 | 0.57 | 1.92 | 2.32 | 1.25 | 0.67 | 0.95 | 1.51 | 2.00 |
| 00760 | 0.48 | 1.94 | 2.31 | 1.50 | 0.69 | 1.65 | 1.54 | 2.00 | 0.50 | 1.94 | 2.31 | 1.50 | 0.67 | 1.65 | 1.54 | 2.00 |
| 00770 | 0.48 | 1.81 | 2.05 | 1.50 | 0.69 | 1.08 | 1.96 | 2.00 | 0.50 | 1.81 | 2.05 | 1.50 | 0.64 | 1.08 | 1.96 | 2.00 |

|       |      |      |      |      |      |      |      |      |      |      |      |      |      |      |      |      |
|-------|------|------|------|------|------|------|------|------|------|------|------|------|------|------|------|------|
| 00780 | 0.38 | 1.45 | 5.17 | 1.00 | 0.52 | 1.12 | 2.60 | 2.00 | 0.56 | 1.45 | 5.17 | 1.00 | 0.50 | 1.12 | 2.60 | 1.50 |
| 00790 | 0.43 | 1.65 | 2.54 | 1.00 | 0.50 | 0.76 | 1.27 | 2.00 | 0.39 | 1.65 | 2.54 | 1.00 | 0.48 | 0.76 | 1.27 | 2.50 |
| 00860 | 0.52 | 2.19 | 1.34 | 1.50 | 0.67 | 1.83 | 1.48 | 2.00 | 0.63 | 2.19 | 1.34 | 1.25 | 0.76 | 1.83 | 1.48 | 2.00 |
| 00900 | 0.33 | 1.53 | 2.68 | 0.50 | 0.61 | 0.49 | 0.79 | 4.00 | 0.40 | 1.53 | 2.68 | 0.50 | 0.62 | 0.49 | 0.79 | 3.00 |
| 00910 | 0.41 | 1.66 | 2.50 | 1.00 | 0.71 | 0.65 | 1.26 | 3.50 | 0.50 | 1.66 | 2.50 | 1.50 | 0.54 | 0.65 | 1.26 | 3.50 |
| 00970 | 0.71 | 0.80 | 5.33 | 1.00 | 0.77 | 1.22 | 2.82 | 1.25 | 0.62 | 0.80 | 5.33 | 1.00 | 0.72 | 1.22 | 2.82 | 1.50 |
| 02020 | 0.49 | 1.54 | 1.87 | 1.00 | 0.60 | 1.36 | 1.45 | 1.50 | 0.57 | 1.54 | 1.87 | 1.00 | 0.60 | 1.36 | 1.45 | 1.00 |
| 02030 | 0.53 | 1.78 | 1.91 | 1.25 | 0.69 | 1.11 | 1.26 | 2.00 | 0.60 | 1.78 | 1.91 | 1.00 | 0.83 | 1.11 | 1.26 | 1.50 |
| 02040 | 0.43 | 2.50 | 1.25 | 1.00 | 0.73 | 1.83 | 1.47 | 1.50 | 0.50 | 2.50 | 1.25 | 0.50 | 0.58 | 1.83 | 1.47 | 2.00 |
| 02060 | 0.65 | 1.84 | 1.64 | 1.00 | 0.79 | 1.62 | 1.34 | 1.50 | 0.67 | 1.84 | 1.64 | 1.00 | 0.68 | 1.62 | 1.34 | 1.50 |
| 03018 | 1.00 | 3.50 | 0.00 | 1.00 | 1.00 | 3.50 | 0.00 | 1.00 | 1.00 | 3.50 | 0.00 | 1.00 | 1.00 | 3.50 | 0.00 | 1.00 |
| 03410 | 0.73 | 0.00 | 2.36 | 1.00 | 0.83 | 2.40 | 2.61 | 1.00 | 0.73 | 0.00 | 2.36 | 1.00 | 0.83 | 2.40 | 2.61 | 1.00 |
| 03430 | 0.69 | 0.00 | 2.47 | 1.00 | 0.89 | 1.87 | 2.11 | 1.00 | 0.69 | 0.00 | 2.47 | 1.00 | 0.89 | 1.87 | 2.11 | 1.00 |
| 04122 | 0.53 | 1.79 | 2.69 | 1.00 | 0.61 | 1.65 | 2.55 | 1.50 | 0.50 | 1.79 | 2.69 | 1.00 | 0.60 | 1.65 | 2.55 | 1.00 |

ct

Table 1:

## 2 Oscillating multi-omics measures on E.coli 66 pathways taking into account the average effect of 69 antibiotic treatments

The similarity of observed oscillating multi-omics patterns with respect to ideal patterns ( $\sigma_{obs}$ ), the pathway dyadic/anti-dyadic effect magnitudes,  $\widehat{m}_{10}$  and  $\widehat{m}_{1100}$  and the reciprocal influences  $RI$  given in output from MORA, are observed on 66 pathways taking into account the average effect of 69 integrated perturbations induced by antibiotics. These measures are taken on MLS without pathway modifications, with operon compressions, with path extensions and with operon compression followed by path extensions. Tables S1 and S2 row names are labeled with their unique E.coli KEGG identifier code (*eco : pathNNNNN*).

| Perturbed<br>(69 treatments)<br>MLS | Pathway | Pathway path extensions |                    |                      |      |                |                    |                      | Pathway<br>operon compression |                |                    |                      | Pathway<br>operon compression<br>and<br>path extensions |                |                    |                      |      |
|-------------------------------------|---------|-------------------------|--------------------|----------------------|------|----------------|--------------------|----------------------|-------------------------------|----------------|--------------------|----------------------|---------------------------------------------------------|----------------|--------------------|----------------------|------|
|                                     |         | $\sigma_{obs}$          | $\widehat{m}_{10}$ | $\widehat{m}_{1100}$ | infl | $\sigma_{obs}$ | $\widehat{m}_{10}$ | $\widehat{m}_{1100}$ | infl                          | $\sigma_{obs}$ | $\widehat{m}_{10}$ | $\widehat{m}_{1100}$ | infl                                                    | $\sigma_{obs}$ | $\widehat{m}_{10}$ | $\widehat{m}_{1100}$ | infl |
| KEGG eco:path                       |         |                         |                    |                      |      |                |                    |                      |                               |                |                    |                      |                                                         |                |                    |                      |      |
| 00010                               |         | 0.50                    | 1.81               | 1.88                 | 1.00 | 0.59           | 1.30               | 1.50                 | 2.00                          | 0.58           | 1.81               | 1.88                 | 1.00                                                    | 0.72           | 1.30               | 1.50                 | 1.50 |
| 00020                               |         | 0.58                    | 1.74               | 1.89                 | 1.50 | 0.55           | 0.58               | 0.92                 | 2.00                          | 0.61           | 1.74               | 1.89                 | 1.50                                                    | 0.48           | 0.58               | 0.92                 | 2.00 |
| 00030                               |         | 0.71                    | 1.85               | 2.17                 | 1.50 | 0.63           | 1.08               | 1.30                 | 2.00                          | 0.72           | 1.85               | 2.17                 | 1.50                                                    | 0.78           | 1.08               | 1.30                 | 2.00 |
| 00040                               |         | 0.54                    | 1.84               | 2.20                 | 1.50 | 0.41           | 1.52               | 1.68                 | 2.00                          | 0.53           | 1.84               | 2.20                 | 1.50                                                    | 0.57           | 1.52               | 1.68                 | 2.00 |
| 00051                               |         | 0.58                    | 1.80               | 2.14                 | 1.25 | 0.72           | 1.53               | 1.51                 | 2.00                          | 0.63           | 1.80               | 2.14                 | 1.00                                                    | 0.60           | 1.53               | 1.51                 | 2.00 |
| 00052                               |         | 0.51                    | 1.83               | 2.74                 | 1.00 | 0.47           | 1.35               | 1.81                 | 2.00                          | 0.56           | 1.83               | 2.74                 | 1.00                                                    | 0.52           | 1.35               | 1.81                 | 1.50 |
| 00053                               |         | 0.39                    | 2.99               | 0.80                 | 1.50 | 0.42           | 0.87               | 1.12                 | 3.00                          | 0.23           | 2.99               | 0.80                 | 1.50                                                    | 0.43           | 0.87               | 1.12                 | 2.00 |
| 00061                               |         | 0.36                    | 1.59               | 1.11                 | 1.25 | 0.64           | 1.07               | 1.40                 | 1.50                          | 0.14           | 1.59               | 1.11                 | 1.00                                                    | 0.50           | 1.07               | 1.40                 | 1.50 |
| 00071                               |         | 0.75                    | 2.59               | 1.35                 | 1.50 | 0.70           | 2.37               | 1.27                 | 2.00                          | 0.60           | 2.59               | 1.35                 | 1.50                                                    | 0.78           | 2.37               | 1.27                 | 2.00 |
| 00130                               |         | 0.63                    | 2.07               | 3.74                 | 1.00 | 0.38           | 0.90               | 1.05                 | 3.50                          | 0.69           | 2.07               | 3.74                 | 1.00                                                    | 0.39           | 0.90               | 1.05                 | 2.00 |
| 00190                               |         | 0.62                    | 1.44               | 1.79                 | 1.00 | 0.78           | 1.10               | 1.37                 | 1.50                          | 0.50           | 1.44               | 1.79                 | 1.00                                                    | 0.58           | 1.10               | 1.37                 | 1.75 |
| 00220                               |         | 0.73                    | 1.71               | 2.49                 | 1.50 | 0.72           | 1.32               | 1.97                 | 2.00                          | 0.69           | 1.71               | 2.49                 | 1.50                                                    | 0.74           | 1.32               | 1.97                 | 2.00 |
| 00230                               |         | 0.54                    | 2.01               | 1.89                 | 1.00 | 0.52           | 1.09               | 0.97                 | 2.00                          | 0.62           | 2.01               | 1.89                 | 1.00                                                    | 0.64           | 1.09               | 0.97                 | 2.00 |
| 00240                               |         | 0.58                    | 2.16               | 1.91                 | 1.00 | 0.58           | 1.35               | 1.19                 | 2.00                          | 0.64           | 2.16               | 1.91                 | 1.00                                                    | 0.66           | 1.35               | 1.19                 | 2.00 |
| 00250                               |         | 0.63                    | 2.05               | 1.74                 | 1.00 | 0.68           | 1.77               | 1.14                 | 2.00                          | 0.62           | 2.05               | 1.74                 | 1.00                                                    | 0.71           | 1.77               | 1.14                 | 2.00 |
| 00260                               |         | 0.50                    | 1.94               | 2.13                 | 1.00 | 0.61           | 1.58               | 1.92                 | 1.50                          | 0.53           | 1.94               | 2.13                 | 1.00                                                    | 0.54           | 1.58               | 1.92                 | 1.50 |
| 00261                               |         | 0.68                    | 2.31               | 1.53                 | 1.50 | 0.72           | 1.39               | 0.59                 | 2.00                          | 0.49           | 2.31               | 1.53                 | 1.50                                                    | 0.65           | 1.39               | 0.59                 | 2.00 |
| 00270                               |         | 0.53                    | 1.95               | 2.31                 | 1.00 | 0.56           | 1.33               | 1.94                 | 2.00                          | 0.57           | 1.95               | 2.31                 | 1.00                                                    | 0.69           | 1.33               | 1.94                 | 2.00 |
| 00280                               |         | 0.67                    | 2.10               | 1.88                 | 1.50 | 0.55           | 2.21               | 1.30                 | 1.50                          | 0.71           | 2.10               | 1.88                 | 1.25                                                    | 0.56           | 2.21               | 1.30                 | 1.50 |
| 00290                               |         | 0.52                    | 1.69               | 2.05                 | 1.50 | 0.65           | 1.37               | 1.77                 | 1.50                          | 0.46           | 1.69               | 2.05                 | 1.00                                                    | 0.51           | 1.37               | 1.77                 | 1.50 |
| 00300                               |         | 0.38                    | 2.19               | 1.62                 | 1.00 | 0.47           | 1.71               | 1.41                 | 1.00                          | 0.42           | 2.19               | 1.62                 | 1.00                                                    | 0.43           | 1.71               | 1.41                 | 1.00 |
| 00310                               |         | 0.30                    | 1.55               | 2.52                 | 1.50 | 0.64           | 1.30               | 2.10                 | 1.50                          | 0.43           | 1.55               | 2.52                 | 1.00                                                    | 0.71           | 1.30               | 2.10                 | 1.50 |
| 00330                               |         | 0.69                    | 2.06               | 1.88                 | 1.50 | 0.49           | 1.05               | 1.18                 | 2.75                          | 0.80           | 2.06               | 1.88                 | 1.25                                                    | 0.65           | 1.05               | 1.18                 | 2.00 |

|       |      |      |      |      |      |      |      |      |      |      |      |      |      |      |      |      |
|-------|------|------|------|------|------|------|------|------|------|------|------|------|------|------|------|------|
| 00340 | 0.32 | 1.42 |      | 1.50 | 0.45 | 2.37 | 0.44 | 2.00 | 0.32 | 1.42 |      | 1.50 | 0.75 | 2.37 | 0.44 | 2.00 |
| 00360 | 0.60 | 1.73 | 2.15 | 1.50 | 0.56 | 1.73 | 1.86 | 2.00 | 0.65 | 1.73 | 2.15 | 1.50 | 0.58 | 1.73 | 1.86 | 1.50 |
| 00362 | 0.39 | 2.24 | 1.58 | 2.00 | 0.50 | 1.44 | 0.81 | 2.50 | 0.24 | 2.24 | 1.58 | 1.50 | 0.44 | 1.44 | 0.81 | 2.00 |
| 00380 | 0.29 | 2.24 | 1.12 | 1.25 | 0.62 | 2.17 | 1.88 | 2.00 | 0.29 | 2.24 | 1.12 | 1.25 | 0.62 | 2.17 | 1.88 | 2.00 |
| 00400 | 0.75 | 1.86 | 1.79 | 1.00 | 0.70 | 1.56 | 1.58 | 1.50 | 0.53 | 1.86 | 1.79 | 1.25 | 0.56 | 1.56 | 1.58 | 1.50 |
| 00410 | 0.50 | 1.96 | 2.57 | 1.00 | 0.60 | 1.06 | 2.26 | 2.00 | 0.38 | 1.96 | 2.57 | 1.00 | 0.65 | 1.06 | 2.26 | 2.00 |
| 00440 | 0.75 | 1.67 |      | 1.50 | 0.75 | 1.67 |      | 1.50 | 0.75 | 1.67 |      | 1.50 | 0.75 | 1.67 |      | 1.50 |
| 00450 | 0.71 | 2.21 | 1.81 | 1.00 | 0.62 | 1.12 | 0.99 | 2.00 | 0.76 | 2.21 | 1.81 | 1.00 | 0.57 | 1.12 | 0.99 | 2.00 |
| 00480 | 0.67 | 2.46 | 2.53 | 1.50 | 0.68 | 1.77 | 1.43 | 1.50 | 0.67 | 2.46 | 2.53 | 1.50 | 0.58 | 1.77 | 1.43 | 1.50 |
| 00500 | 0.67 | 1.89 | 2.60 | 1.00 | 0.48 | 1.29 | 1.38 | 2.00 | 0.72 | 1.89 | 2.60 | 1.00 | 0.61 | 1.29 | 1.38 | 2.00 |
| 00520 | 0.49 | 1.88 | 1.93 | 1.00 | 0.58 | 1.42 | 1.03 | 2.00 | 0.55 | 1.88 | 1.93 | 1.00 | 0.65 | 1.42 | 1.03 | 2.00 |
| 00521 | 0.50 | 1.93 | 2.01 | 1.50 | 0.69 | 1.31 | 1.08 | 2.25 | 0.50 | 1.93 | 2.01 | 1.00 | 0.80 | 1.31 | 1.08 | 1.75 |
| 00540 | 0.52 | 1.93 | 1.92 | 1.00 | 0.38 | 1.01 | 0.73 | 2.50 | 0.55 | 1.93 | 1.92 | 1.00 | 0.59 | 1.01 | 0.73 | 2.00 |
| 00550 | 0.64 | 1.36 | 2.65 | 1.00 | 0.46 | 1.23 | 1.57 | 2.00 | 0.53 | 1.36 | 2.65 | 0.75 | 0.50 | 1.23 | 1.57 | 1.25 |
| 00561 | 0.39 | 1.73 | 3.32 | 1.00 | 0.50 | 1.77 | 2.52 | 1.50 | 0.41 | 1.73 | 3.32 | 1.00 | 0.50 | 1.77 | 2.52 | 1.50 |
| 00564 | 0.50 | 2.36 | 1.61 | 1.00 | 0.49 | 1.74 | 1.40 | 1.50 | 0.48 | 2.36 | 1.61 | 1.00 | 0.48 | 1.74 | 1.40 | 1.50 |
| 00620 | 0.53 | 2.06 | 2.11 | 1.50 | 0.49 | 0.73 | 0.87 | 4.00 | 0.59 | 2.06 | 2.11 | 1.50 | 0.56 | 0.73 | 0.87 | 2.00 |
| 00627 | 0.48 | 3.96 |      | 1.00 | 0.73 | 1.34 | 6.79 | 1.50 | 0.30 | 3.96 |      | 1.00 | 0.55 | 1.34 | 6.79 | 1.50 |
| 00630 | 0.55 | 1.81 | 2.19 | 1.00 | 0.60 | 1.20 | 1.32 | 2.00 | 0.48 | 1.81 | 2.19 | 1.00 | 0.70 | 1.20 | 1.32 | 2.00 |
| 00640 | 0.30 | 2.20 | 1.75 | 1.00 | 0.36 | 1.83 | 1.65 | 2.00 | 0.29 | 2.20 | 1.75 | 1.00 | 0.40 | 1.83 | 1.65 | 2.00 |
| 00650 | 0.53 | 2.07 | 1.91 | 1.00 | 0.50 | 0.75 | 1.06 | 2.00 | 0.52 | 2.07 | 1.91 | 1.00 | 0.48 | 0.75 | 1.06 | 2.00 |
| 00660 | 0.31 | 1.40 | 1.39 | 1.00 | 0.41 | 1.24 | 1.16 | 1.75 | 0.66 | 1.40 | 1.39 | 1.00 | 0.40 | 1.24 | 1.16 | 1.50 |
| 00670 | 0.47 | 1.90 | 2.08 | 1.75 | 0.45 | 1.45 | 1.75 | 2.00 | 0.47 | 1.90 | 2.08 | 1.75 | 0.51 | 1.45 | 1.75 | 2.00 |
| 00680 | 0.38 | 1.79 | 2.14 | 1.00 | 0.62 | 1.55 | 1.83 | 2.00 | 0.28 | 1.79 | 2.14 | 0.75 | 0.54 | 1.55 | 1.83 | 2.00 |
| 00730 | 0.80 | 1.46 | 2.48 | 1.00 | 0.54 | 1.21 | 2.07 | 1.50 | 0.80 | 1.46 | 2.48 | 1.00 | 0.57 | 1.21 | 2.07 | 1.50 |
| 00740 | 0.50 | 1.29 | 3.17 | 1.50 | 0.55 | 0.82 | 1.78 | 2.00 | 0.57 | 1.29 | 3.17 | 1.50 | 0.57 | 0.82 | 1.78 | 1.50 |
| 00750 | 0.63 | 1.87 | 1.28 | 1.50 | 0.69 | 1.26 | 1.46 | 2.00 | 0.71 | 1.87 | 1.28 | 1.25 | 0.70 | 1.26 | 1.46 | 2.00 |
| 00760 | 0.76 | 1.71 | 2.09 | 1.50 | 0.57 | 1.52 | 1.64 | 2.00 | 0.78 | 1.71 | 2.09 | 1.50 | 0.61 | 1.52 | 1.64 | 2.00 |



|       |      |      |      |      |      |      |      |      |      |      |      |      |      |      |      |      |
|-------|------|------|------|------|------|------|------|------|------|------|------|------|------|------|------|------|
| 00770 | 0.60 | 1.64 | 2.25 | 1.50 | 0.64 | 1.47 | 2.22 | 2.00 | 0.53 | 1.64 | 2.25 | 1.50 | 0.52 | 1.47 | 2.22 | 2.00 |
| 00780 | 0.25 | 1.41 | 4.51 | 1.00 | 0.58 | 1.15 | 2.30 | 2.00 | 0.38 | 1.41 | 4.51 | 1.00 | 0.43 | 1.15 | 2.30 | 1.25 |
| 00790 | 0.67 | 2.19 | 1.74 | 1.00 | 0.47 | 1.17 | 1.15 | 2.00 | 0.72 | 2.19 | 1.74 | 1.00 | 0.65 | 1.17 | 1.15 | 2.00 |
| 00860 | 0.48 | 1.68 | 2.29 | 1.50 | 0.48 | 1.49 | 1.73 | 2.00 | 0.42 | 1.68 | 2.29 | 1.25 | 0.54 | 1.49 | 1.73 | 2.00 |
| 00900 | 0.55 | 1.71 | 2.11 | 0.75 | 0.39 | 0.76 | 0.68 | 4.00 | 0.67 | 1.71 | 2.11 | 0.75 | 0.60 | 0.76 | 0.68 | 2.00 |
| 00910 | 0.55 | 2.06 | 2.02 | 1.25 | 0.55 | 0.62 | 0.92 | 3.50 | 0.59 | 2.06 | 2.02 | 1.50 | 0.59 | 0.62 | 0.92 | 3.50 |
| 00970 | 0.54 | 3.26 | 1.68 | 1.00 | 0.54 | 1.81 | 2.80 | 1.25 | 0.52 | 3.26 | 1.68 | 1.00 | 0.57 | 1.81 | 2.80 | 1.50 |
| 02020 | 0.45 | 1.89 | 1.85 | 1.00 | 0.44 | 1.50 | 1.94 | 1.50 | 0.52 | 1.89 | 1.85 | 1.00 | 0.49 | 1.50 | 1.94 | 1.00 |
| 02030 | 0.26 | 0.60 | 1.50 | 1.25 | 0.42 | 0.99 | 0.92 | 2.00 | 0.50 | 0.60 | 1.50 | 1.00 | 0.60 | 0.99 | 0.92 | 1.00 |
| 02040 | 0.46 | 1.94 | 1.46 | 1.00 | 0.55 | 2.19 | 1.32 | 1.50 | 0.50 | 1.94 | 1.46 | 0.50 | 0.69 | 2.19 | 1.32 | 1.75 |
| 02060 | 0.44 | 2.16 | 2.58 | 1.00 | 0.53 | 1.65 | 1.44 | 1.50 | 0.58 | 2.16 | 2.58 | 1.00 | 0.63 | 1.65 | 1.44 | 1.00 |
| 03018 | 0.86 | 3.50 | 0.00 | 1.00 | 0.86 | 3.50 | 0.00 | 1.00 | 0.86 | 3.50 | 0.00 | 1.00 | 0.86 | 3.50 | 0.00 | 1.00 |
| 03410 | 0.63 | 0.00 | 3.13 | 1.00 | 0.62 | 2.57 | 2.52 | 1.00 | 0.63 | 0.00 | 3.13 | 1.00 | 0.62 | 2.57 | 2.52 | 1.00 |
| 03430 | 0.47 | 0.00 | 2.90 | 1.00 | 0.58 | 2.16 | 1.59 | 1.00 | 0.47 | 0.00 | 2.90 | 1.00 | 0.61 | 2.16 | 1.59 | 1.00 |
| 04122 | 0.60 | 2.27 | 1.95 | 1.00 | 0.44 | 1.96 | 1.59 | 1.50 | 0.58 | 2.27 | 1.95 | 1.00 | 0.42 | 1.96 | 1.59 | 1.00 |

Table 2:
